# Supplementary material for: The Coordination of Leaf Photosynthesis Links C and N Fluxes in C3 Plant Species
Source: PLoS One. 2012 Jun 7;7(6):e38345. doi: 10.1371/journal.pone.0038345 (PMC3369925; doi:10.1371/journal.pone.0038345)
Supplement: Table S1 — Dataset used for the validation of leaf photosynthesis coordination. The excel file includes the leaf photosynthetic parameters and the environmental growth conditions used to calculate W c, W j and N ac. (XLS) [file pone.0038345.s004.xls]

## Sheet: LEGEND
General Comments:	Area based data are related to projected leaf area (in contrast to "one sided leaf area" or "total leaf area")
	The metabolic values are given at a reference temperature of 20°C
Headers:	Comment	Unit
PPFD	Photosynthetic photon flux density	µmol m-2 s-1
Tmean	Daily temperature (only during the photoperiod)	°C
Tgrowth	Mean daily temperature during the month preceding the measure	°C
hs	Mean relative humidity	-
k3	Ratio between Vcmax and the leaf protein content	µmolCO2 g-1N s-1
Jfac	Ratio between Vcmax and Jmax	-
SLA	Specific leaf area	m2 g-1
Na	Leaf nitrogen content measured	gN m-2
Nac	Leaf nitrogen content predicted	gN m-2
Nac std	Leaf nitrogen content predicted under standardised environment	gN m-2
Npa	Leaf protein content observed with optimised fns	gN m-2
Npac	Leaf protein content predicted	gN m-2
Npac std	Leaf protein content predicted under standardised environment	gN m-2
fns	Leaf structural N content optimised	gN g-1
Lightgrowth	Light environment during growth	micro mol m-2 s-1 PAR if not explicitely defined in comment
Lightgrowthcom	Comment
Tgrowth	Growth temperature: average temperature (day and night) during week to month before measurements
Ca	CO2 concentration during measurement	ppm
Data labels:
source
1	PHD thesis Jens Kattge (2002)	Climate Chambers; Rauischholzhausen; Giessen; Germany
2	Unpublished data	Natural vegetation in Giessen, Germany, and France
3	Unpublished data	Open-top chambers and FACE, Giessen
4	PHD thesis Uwe Grueters (2000)	wheat, CO2 experiments, Open-top, Giessen
5	Ripullone et al. (2003)	Populus and Pseudotsuga, LeafN, Vcmax, Jmax, amax, ci/ca
6	Unpublished data François Gastal	Poaceae, Lusignan, France
7	Unpublished data Ph-D Thesis Vincent Maire	Poaceae, Theix, France
8	Martre et al. (2003)	Wheat, field and outdoor climate chamber, N experiments, Clermont-Ferrand, France
9	Bertheloot et al. (2008a)	Wheat, field, N experiment, Clermont-Ferrand, France
10	Bertheloot et al. (2008b)	Wheat, field, N experiment, Clermont-Ferrand, France
pft
3	temperate broadleaved evergreen trees and evergreen coniferous trees
4	temperate broadleaved deciduous trees
8	deciduous shrubs and herbs
10	C3 herbaceous
12	C3 crops (Triticum aestivum)
16	N fixing trees
Expo: Exposition
0	Natural vegetation
1	Botanical garden
2	Free Air CO2 enrichment (FACE)
3	Open top chamber
4	Climate chamber
5	Sunlit climate chamber
CO2: Air carbon dioxide concentration
1	actual
2	elevated
N: Nitrogen availability
1	low
2	intermediate
3	high
H2O: Water availability
2	medium
3	high
Reference
9	Bertheloot, J., Martre, P. & Andrieu, B. (2008) Dynamics of Light and Nitrogen Distribution during Grain Filling within Wheat Canopy. Plant Physiology 148, 1707-1720.
10	Bertheloot, J., Andrieu, B., Fournier, C. & Martre, P. (2008) A process-based model to simulate nitrogen distribution in wheat (Triticum aestivum) during grain-filling. Functional Plant Biology 35, 781-796.
8	Martre, P., Porter, J.R., Jamieson, P.D. & Triboi, E. (2003) Modeling grain nitrogen accumulation and protein composition to understand the Sink/Source regulations of nitrogen remobilization for wheat. Plant Physiology 133, 1959-1967.
5	Ripullone, F., Grassi, G., Lauteri, M. & Borghetti, M. (2003) Photosynthesis-nitrogen relationships: interpretation of different patterns between Pseudotsuga menziesii and Populus x euroamericana in a mini-stand experiment. Tree Physiology 23, 137-144.

## Sheet: data_all
	Vegetation class			Category of environment				Value of environmental variables			Photosynthtetic parameters				Leaf traits
source	pft	Species & Cultivar	Species name	Expo	CO2	H2O	N level	PPFD	Tgrowth	hs	k3	Jfac	Vcmax	Jmax	SLA	fns	Na	Nac	Npa	Npac
1	6	1	Acacia dealba	4	1	3	4	500	21	0.8	25.3665	2.58328	28.1008	71.5806	24.8804	0.013537	1.6519	1.85931	1.10779	1.3152
1	6	1	Acacia dealba	4	1	3	3	500	21	0.8	29.9675	2.15815	41.5115	88.0937	18.2371	0.013537	2.12753	1.56119	1.38522	0.81888
1	6	1	Acacia dealba	4	1	3	2	500	21	0.8	37.639	2.35738	34.3027	79.6296	22.8916	0.013537	1.50274	1.38269	0.91136	0.791313
1	6	1	Acacia dealba	4	1	3	1	500	21	0.8	37.0876	2.33665	43.7017	100.542	19.8265	0.013537	1.86114	1.48815	1.17834	0.805351
1	6	1	Acacia dealba	4	2	3	4	500	21	0.8	18.0429	2.43929	16.5283	43.4782	23.2358	0.013537	1.96249	2.27813	1.37987	1.69551
1	6	1	Acacia dealba	4	2	3	3	500	21	0.8	28.4903	2.52312	29.5713	80.2672	23.7838	0.013537	1.88784	1.60736	1.31865	1.03816
1	6	1	Acacia dealba	4	2	3	2	500	21	0.8	42.4801	2.22091	39.3386	94.8905	19.8676	0.013537	1.76167	1.11997	1.08028	0.438579
1	6	1	Acacia dealba	4	2	3	1	500	21	0.8	99.777	2.3378	15.1329	38.2717	13.3925	0.013537	1.17232	1.19748	0.161482	0.186646
1	6	2	Acacia melanoxylon	4	2	3	4	500	21	0.8	20.2214	2.41807	29.6076	77.2556	12.844	0.013537	3.14543	2.54695	2.09143	1.49295
1	6	2	Acacia melanoxylon	4	1	3	3	500	21	0.8	23.1516	2.369	42.9117	100.113	14.4927	0.013537	2.7876	2.25468	1.8535	1.32059
1	6	2	Acacia melanoxylon	4	2	3	3	500	21	0.8	26.4241	2.59784	41.4643	115.647	10.8328	0.013537	3.28632	2.47924	2.03663	1.22955
1	6	2	Acacia melanoxylon	4	1	3	2	500	21	0.8	72.7917	2.09419	38.2276	78.6797	16.3043	0.013537	1.35547	1.12706	0.525164	0.296754
1	6	2	Acacia melanoxylon	4	2	3	2	500	21	0.8	39.6618	2.24993	33.5262	81.8431	15.8959	0.013537	1.84953	1.3478	0.997891	0.49616
1	6	2	Acacia melanoxylon	4	1	3	1	500	21	0.8	26.0757	2.5311	37.7662	94.2304	18.5471	0.013537	2.17823	2.01237	1.44833	1.28247
1	6	2	Acacia melanoxylon	4	2	3	1	500	21	0.8	27.2705	2.41886	36.3931	94.9896	12.7388	0.013537	2.7789	2.07728	1.7162	1.01457
1	6	3	Alnus glutinosa	4	2	3	4	500	21	0.8	25.8489	2.78395	23.2078	69.0478	18.9781	0.013537	1.88638	2.06107	1.17305	1.34775
1	6	3	Alnus glutinosa	4	1	3	4	500	21	0.8	31.0878	2.38299	36.0082	84.5111	19.0476	0.013537	1.869	1.69135	1.15828	0.980622
1	6	3	Alnus glutinosa	4	2	3	3	500	21	0.8	53.5097	3.09336	20.6793	67.9232	13.4503	0.013537	1.44235	1.62639	0.435859	0.6199
1	6	3	Alnus glutinosa	4	1	3	3	500	21	0.8	36.426	2.11191	22.5835	46.8814	29.9401	0.013537	1.07214	1.01541	0.619984	0.563252
1	6	3	Alnus glutinosa	4	2	3	2	500	21	0.8	52.6283	3.25693	17.8624	61.5924	14.5	0.013537	1.31724	1.58501	0.383612	0.651383
1	6	3	Alnus glutinosa	4	1	3	2	500	21	0.8	54.9303	2.54495	24.4056	61.2325	17.9212	0.013537	1.1997	1.34308	0.444302	0.58768
1	6	3	Alnus glutinosa	4	1	3	3	500	21	0.8	38.9711	2.42345	25.2547	60.2945	24.7863	0.013537	1.19421	1.32122	0.648038	0.775044
1	6	3	Alnus glutinosa	4	2	3	3	500	21	0.8	37.8317	2.9468	19.0275	59.709	20.4724	0.013537	1.26023	1.54181	0.59897	0.880555
1	6	3	Alnus glutinosa	4	1	3	3	500	21	0.8	32.3999	2.34052	21.6491	49.8908	26.7327	0.013537	1.17459	1.36529	0.668183	0.858884
1	6	3	Alnus glutinosa	4	2	3	3	500	21	0.8	37.2822	3.12965	19.7493	65.5854	16.8539	0.013537	1.43587	1.75159	0.632639	0.948362
1	6	3	Alnus glutinosa	4	1	3	3	500	21	0.8	44.8887	2.17745	27.1339	58.1061	30.0469	0.013537	1.05502	0.985095	0.604471	0.534547
1	6	3	Alnus glutinosa	4	1	3	4	500	21	0.8	22.9811	2.18137	26.6245	57.1193	21.978	0.013537	1.7745	1.66217	1.15854	1.04621
1	6	3	Alnus glutinosa	4	2	3	3	500	21	0.8	30.0119	3.16943	23.7452	79.7999	18.5185	0.013537	1.7226	1.99474	0.991569	1.26371
1	6	3	Alnus glutinosa	4	2	3	4	500	21	0.8	20.9437	2.62072	16.8558	47.3979	22.2996	0.013537	1.73994	2.20273	1.13286	1.59566
1	6	3	Alnus glutinosa	4	1	3	3	500	21	0.8	39.634	2.17331	23.9506	51.19	26.4151	0.013537	1.11679	1.09969	0.604295	0.587196
1	6	3	Alnus glutinosa	4	2	3	3	500	21	0.8	30.8845	3.27164	22.5519	78.0945	17.5676	0.013537	1.67923	2.01379	0.908628	1.24319
1	6	3	Alnus glutinosa	4	2	3	3	500	21	0.8	34.1799	2.49297	22.6656	60.8391	27.1186	0.013537	1.30537	1.29021	0.806171	0.791008
1	6	3	Alnus glutinosa	4	2	3	3	500	21	0.8	22.6098	2.25	13.8436	33.7956	26.009	0.013537	1.35722	1.3814	0.836722	0.860902
1	6	3	Alnus glutinosa	4	1	3	3	500	21	0.8	32.5225	2.14039	23.9706	50.4434	30.4762	0.013537	1.18125	1.12115	0.737047	0.676953
2	2	4	Castanea sativa	1	1	2	2	708	16	0.6	54.33	1.98	33.0642	70.2284	13.6396	0.011299	1.43699	1.39926	0.608581	0.570849
2	2	4	Castanea sativa	0	1	3	2	833	20	0.8	197.203	2.5088	19.7205	49.4748	12.84	0.011299	0.98	1.1614	0.100001	0.281402
2	2	4	Castanea sativa	0	1	3	2	833	20	0.8	181.39	2.5088	18.1392	45.5077	12.84	0.011299	0.98	1.18362	0.100001	0.303624
2	2	4	Castanea sativa	0	1	3	2	833	20	0.8	223.436	2.5088	22.3438	56.0563	12.84	0.011299	0.98	1.13131	0.100001	0.251312
2	2	5	Catalpa obata	1	1	2	2	708	16	0.6	39.4889	1.98	34.2538	72.755	11.9904	0.011299	1.80978	1.74256	0.867428	0.800204
2	3	6	Chenopodium album	3	1	2	3	627	16	0.6	28.7596	2.6925	79.3929	225.198	14.2857	0.011163	3.542	3.29667	2.76057	2.51524
2	3	6	Chenopodium album	3	2	2	3	627	16	0.6	56.5038	2.62684	51.0973	153.194	12.7701	0.011163	1.88722	1.89076	1.01305	1.01659
2	3	6	Chenopodium album	3	2	2	4	627	16	0.6	23.0893	2.54289	40.1708	117.063	17.7305	0.011163	2.9892	3.41577	2.35959	2.78616
2	3	6	Chenopodium album	3	1	2	4	627	16	0.6	29.2893	2.64758	58.1639	162.369	19.305	0.011163	2.5641	2.93154	1.98584	2.35328
2	3	6	Chenopodium album	3	1	2	2	627	16	0.6	52.5282	2.69773	69.5643	209.651	13.8461	0.011163	2.13056	2.23701	1.32432	1.43077
2	3	6	Chenopodium album	3	2	2	2	627	16	0.6	50.6425	2.54025	70.6762	205.773	10.4302	0.011163	2.65574	2.1896	1.58546	1.11932
2	3	6	Chenopodium album	3	2	2	1	627	16	0.6	63.0786	2.40672	42.6355	118.44	12.8866	0.011163	1.61408	1.61966	0.74781	0.753392
3	3	6	Chenopodium album	2	1	2	1	555	18	0.6	34.6724	2.12973	52.8562	116.375	29.4118	0.011163	1.904	1.41555	1.52445	1.036
3	3	6	Chenopodium album	2	1	2	1	555	18	0.6	36.4098	2.41724	66.116	164.579	24.6914	0.011163	2.268	1.75374	1.81589	1.30163
3	3	6	Chenopodium album	2	2	2	2	555	18	0.6	42.988	2.50756	47.5143	133.363	22.409	0.011163	1.785	1.4518	1.28684	0.953643
3	3	6	Chenopodium album	2	2	2	2	555	18	0.6	42.8498	3.03473	50.0071	166.722	21.2121	0.011163	1.88571	1.73186	1.35944	1.20559
3	3	6	Chenopodium album	2	2	2	2	555	18	0.6	71.4948	2.47001	55.7216	154.307	19.3488	0.011163	1.42857	1.10645	0.851621	0.5295
3	3	6	Chenopodium album	2	2	2	2	555	18	0.6	49.4813	2.5492	60.0955	171.179	20.8333	0.011163	1.92	1.382	1.38416	0.846158
3	3	6	Chenopodium album	3	2	3	1	627	20	0.8	86.436	2.5088	10.4162	28.4992	16.03	0.011163	0.826	1.04871	0.129601	0.352308
3	3	6	Chenopodium album	3	1	3	1	627	20	0.8	91.9556	2.21	16.7882	37.1019	13.78	0.011163	0.89	1.04682	0.182568	0.339389
3	3	6	Chenopodium album	3	1	3	2	627	20	0.8	43.3727	2.49959	23.5858	58.955	22.96	0.011163	1.03	1.46085	0.543794	0.974649
3	3	6	Chenopodium album	3	2	3	2	627	20	0.8	52.7476	2.98678	25.8874	83.2026	25.06	0.011163	1	1.28667	0.554538	0.841208
3	3	6	Chenopodium album	3	2	3	3	627	20	0.8	54.3256	2.51609	39.0907	107.239	30.17	0.011163	1.18	1.04544	0.809987	0.68
3	3	6	Chenopodium album	3	1	3	3	627	20	0.8	41.3986	2.6058	41.7311	108.743	28.48	0.011163	1.4	1.53519	1.00803	1.14322
3	3	6	Chenopodium album	3	1	3	4	627	20	0.8	39.3438	2.5088	43.585	109.346	36.94	0.011163	1.41	1.46182	1.1078	1.15962
3	3	6	Chenopodium album	3	2	3	4	627	20	0.8	25.5127	2.5088	23.4934	64.2788	34.67	0.011163	1.53	1.9005	1.20801	1.57851
6	4	7	Dactylis glomerata	0	1	2	1	727.036	9.4727	0.804	138.875	1.8	45.2791	98.6624	25.5108	0.013494	0.855	0.912421	0.326041	0.383462
6	4	7	Dactylis glomerata	0	1	2	4	800.856	7.2818	0.856	79.7973	1.8	95.4389	201.744	34.602	0.013494	1.586	1.37676	1.19602	0.98678
6	4	7	Dactylis glomerata	0	1	2	2	785.067	7.5454	0.774	126.229	1.8	93.6173	210.486	19.613	0.013494	1.366	1.31542	0.741645	0.691067
6	4	7	Dactylis glomerata	0	1	2	3	772.8	7.309	0.772	89.0975	1.8	82.5486	186.302	22.7749	0.013494	1.519	1.58741	0.926496	0.994903
6	4	7	Dactylis glomerata	0	1	2	4	760.523	9.2181	0.795	76.0059	1.8	105.094	229.961	24.7467	0.013494	1.928	1.79673	1.38271	1.25144
6	4	7	Dactylis glomerata	0	1	2	2	798.277	7.3363	0.765	121.877	1.8	52.5356	118.515	24.582	0.013494	0.98	1.08189	0.431054	0.532941
6	4	7	Dactylis glomerata	0	1	2	3	723.261	9.0909	0.818	100.818	1.8	85.6567	187.822	21.543	0.013494	1.476	1.44543	0.849616	0.819047
6	4	7	Dactylis glomerata	0	1	2	2	798.277	7.3363	0.765	91.2489	1.8	77.4714	174.767	20.1409	0.013494	1.519	1.64813	0.849011	0.978145
7	4	7	Dactylis glomerata	0	1	2	2	701.518	7.5454	0.887	102.828	1.8	64.6671	136.485	21.796	0.013494	1.248	1.09195	0.628887	0.472836
7	4	7	Dactylis glomerata	0	1	3	3	856.783	10.218	0.8	64.13	1.8	73.6068	158.412	26.8105	0.013494	1.65109	1.71192	1.14777	1.2086
7	4	7	Dactylis glomerata	0	1	3	3	880.242	10.218	0.8	64.13	1.8	78.177	168.248	24.8857	0.013494	1.76128	1.80835	1.21904	1.2661
7	4	7	Dactylis glomerata	0	1	2	3	836.778	10.218	0.6	64.13	2	114.996	270.486	15.9626	0.013494	2.63852	2.56163	1.79316	1.71627
7	4	7	Dactylis glomerata	0	1	3	3	939.343	10.218	0.8	64.13	1.8	74.2821	159.866	28.029	0.013494	1.63974	1.81038	1.1583	1.32895
1	1	8	Eucalyptus debeuzevillei	4	1	3	1	500	21	0.8	33.6708	2.38614	32.5408	76.4753	15.8879	0.011445	1.68682	1.62407	0.966439	0.90369
1	1	8	Eucalyptus debeuzevillei	4	2	3	1	500	21	0.8	44.5839	2.58465	25.1708	69.8712	10.9489	0.011445	1.6988	1.67177	0.653463	0.626435
1	1	8	Eucalyptus debeuzevillei	4	1	3	2	500	21	0.8	48.7946	2.21959	42.5939	93.0075	12.2058	0.011445	1.81062	1.48345	0.872922	0.545754
1	1	8	Eucalyptus debeuzevillei	4	2	3	2	500	21	0.8	23.3206	2.43392	23.5096	61.7165	12.3711	0.011445	2.28758	2.15018	1.36242	1.22502
1	1	8	Eucalyptus debeuzevillei	4	1	3	3	500	21	0.8	21.4266	2.27298	33.2782	74.4426	12.0755	0.011445	2.50094	2.23316	1.55313	1.28535
1	1	8	Eucalyptus debeuzevillei	4	2	3	3	500	21	0.8	45.3851	2.16711	31.1961	73.5714	12.2951	0.011445	1.72427	1.26266	0.793385	0.331773
1	1	8	Eucalyptus debeuzevillei	4	1	3	4	500	21	0.8	32.3173	2.01369	42.7723	84.5906	11.4504	0.011445	2.32307	1.54854	1.32351	0.548985
1	1	8	Eucalyptus debeuzevillei	4	2	3	4	500	21	0.8	37.0259	2.24156	35.8878	87.3078	9.36455	0.011445	2.38132	1.75601	1.15912	0.533816
1	1	9	Eucalyptus niphophila	4	1	3	1	500	21	0.8	51.3801	2.12845	30.2435	63.2832	11.4754	0.011445	1.586	1.43085	0.588623	0.433475
1	1	9	Eucalyptus niphophila	4	2	3	1	500	21	0.8	79.455	2.28666	27.6498	68.5135	10.7623	0.011445	1.44021	1.30124	0.37675	0.237785
1	1	9	Eucalyptus niphophila	4	1	3	2	500	21	0.8	34.1781	2.39781	40.8847	96.562	12	0.011445	2.15	1.86359	1.19623	0.909817
1	1	9	Eucalyptus niphophila	4	2	3	2	500	21	0.8	43.9489	2.33487	39.4259	99.5944	10.5263	0.011445	2.128	1.60452	1.0407	0.517216
1	1	9	Eucalyptus niphophila	4	1	3	3	500	21	0.8	31.0039	2.40373	44.3604	105.033	11.5702	0.011445	2.42	2.00164	1.4308	1.01244
1	1	9	Eucalyptus niphophila	4	2	3	3	500	21	0.8	42.2551	2.28826	33.9701	84.229	10.2857	0.011445	2.05139	1.60911	0.938652	0.496368
1	1	9	Eucalyptus niphophila	4	1	3	4	500	21	0.8	39.403	2.02207	51.5491	102.38	10.6667	0.011445	2.38125	1.55359	1.30825	0.48059
1	1	9	Eucalyptus niphophila	4	2	3	4	500	21	0.8	41.2325	2.1951	37.828	90.2705	11.2069	0.011445	2.09692	1.44359	1.07565	0.422318
1	1	9	Eucalyptus niphophila	4	1	3	3	500	21	0.8	46.9994	2.55728	50.3779	127.017	9.47368	0.011445	2.28	1.93961	1.07188	0.731493
1	2	10	Fagus sylvatica	4	1	3	4	500	21	0.8	20.3517	2.34	14.2442	28.4598	19.7183	0.011299	1.27293	1.24588	0.699899	0.672854
1	2	10	Fagus sylvatica	4	2	3	4	500	21	0.8	27.3917	2.34	16.9729	42.9624	17.341	0.011299	1.44743	1.4898	0.795843	0.838211
1	2	10	Fagus sylvatica	4	1	3	2	500	21	0.8	47.7923	2.79947	18.003	49.7507	13.4078	0.011299	1.15604	1.44923	0.313309	0.606497
1	2	10	Fagus sylvatica	4	2	3	3	500	21	0.8	59.2703	2.8607	21.6366	66.0338	14.0187	0.011299	1.21267	1.32037	0.406661	0.514362
1	2	10	Fagus sylvatica	4	2	3	4	500	21	0.8	35.9849	2.5088	12.949	34.9628	13.6344	0.011299	1.26151	1.53776	0.432785	0.709033
1	2	10	Fagus sylvatica	4	2	3	3	500	21	0.8	32.336	3.17394	22.3339	75.1576	13.8812	0.011299	1.66412	1.96243	0.850126	1.14844
1	2	10	Fagus sylvatica	4	1	3	4	500	21	0.8	33.1172	2.74359	33.4588	90.5926	13.363	0.011299	1.85587	1.93526	1.01031	1.08971
1	2	10	Fagus sylvatica	4	2	3	2	500	21	0.8	40.9605	2.98237	9.09826	28.8743	16.1117	0.011299	0.96203	1.47779	0.260727	0.776488
2	2	10	Fagus sylvatica	1	1	2	2	708	16	0.6	28.0167	1.98	21.2098	45.0497	15.4559	0.011299	1.4881	1.57258	0.757042	0.841527
2	2	10	Fagus sylvatica	1	1	2	2	708	16	0.6	36.3948	1.98	26.8572	57.0447	14.5008	0.011299	1.51715	1.53681	0.737941	0.757601
2	2	10	Fagus sylvatica	1	1	2	2	708	16	0.6	29.0439	1.97	17.0084	35.9557	22.3713	0.011299	1.09068	1.08655	0.585608	0.581479
2	2	10	Fagus sylvatica	1	1	2	2	708	16	0.6	34.0599	1.98	20.1746	42.8508	11.4815	0.011299	1.57645	1.65069	0.592327	0.666568
2	2	10	Fagus sylvatica	1	1	2	2	708	16	0.6	32.4639	1.98	18.3236	38.9193	13.8208	0.011299	1.38198	1.46389	0.564429	0.646335
2	2	10	Fagus sylvatica	0	1	3	2	833	20	0.8	77.5137	2.5088	27.4572	68.8848	9.07	0.011299	1.6	1.98551	0.354224	0.739737
2	2	10	Fagus sylvatica	0	1	3	2	833	20	0.8	85.7576	2.5088	30.3774	76.211	9.07	0.011299	1.6	1.92182	0.354224	0.676041
6	4	11	Festuca arundinacea	0	1	2	1	727.036	9.4727	0.804	156.103	1.9	64.1979	146.306	17.0436	0.013494	1.203	1.2035	0.411254	0.411753
6	4	11	Festuca arundinacea	0	1	2	2	756.287	8.0545	0.785	77.2653	1.9	72.5083	168.947	19.712	0.013494	1.623	1.75026	0.938433	1.06569
6	4	11	Festuca arundinacea	0	1	2	4	587.856	7.2818	0.856	80.7602	1.9	122.977	289.963	21.686	0.013494	2.145	2.02322	1.52275	1.40097
6	4	11	Festuca arundinacea	0	1	2	2	747.323	7.5454	0.774	103.348	1.9	76.1301	178.781	18.476	0.013494	1.467	1.43041	0.736637	0.700044
6	4	11	Festuca arundinacea	0	1	2	3	772.8	7.309	0.772	97.296	1.9	91.1095	214.733	19.5402	0.013494	1.627	1.66337	0.936415	0.972786
6	4	11	Festuca arundinacea	0	1	2	4	760.523	9.2181	0.795	101.751	1.9	103.211	236.163	22.2807	0.013494	1.62	1.57577	1.01435	0.970123
6	4	11	Festuca arundinacea	0	1	2	2	798.277	7.3363	0.765	130.332	1.9	75.7619	178.487	20.486	0.013494	1.24	1.36505	0.581297	0.706348
6	4	11	Festuca arundinacea	0	1	2	3	783.261	9.0909	0.818	100.247	1.9	115.232	264.196	16.794	0.013494	1.953	1.80135	1.14949	0.997838
6	4	11	Festuca arundinacea	0	1	2	2	763.836	7.1181	0.772	91.4244	1.9	92.0222	217.517	16.7951	0.013494	1.81	1.76267	1.00654	0.959205
7	4	12	Festuca rubra	0	1	3	3	880.242	10.218	0.8	55.14	1.69	45.0525	92.0037	22.3433	0.013494	1.421	1.42397	0.817056	0.820022
7	4	12	Festuca rubra	0	1	2	3	836.778	10.218	0.6	55.14	1.69	46.2277	94.4038	23.1608	0.013494	1.421	1.50039	0.83837	0.917755
7	4	12	Festuca rubra	0	1	3	3	939.343	10.218	0.8	55.14	1.69	51.8387	105.862	24.6157	0.013494	1.48832	1.50442	0.940129	0.956229
2	2	13	Ginkgo biloba	1	1	2	2	708	16	0.6	57.4275	1.98	28.648	60.8483	18.043	0.011299	1.12509	1.12502	0.498854	0.498784
2	3	14	Knautia dipsacifolia	0	1	3	2	833	20	0.8	78.7292	2.5088	36.7813	92.277	12.79	0.011163	1.34	1.62596	0.467187	0.753146
2	3	14	Knautia dipsacifolia	0	1	3	2	833	20	0.8	69.3663	2.5088	32.407	81.3029	12.79	0.011163	1.34	1.71477	0.467187	0.841962
2	3	14	Knautia dipsacifolia	0	1	3	2	833	20	0.8	89.9855	2.5088	42.0401	105.47	12.79	0.011163	1.34	1.54314	0.467187	0.670329
2	3	15	Ligustrum lucidum	0	1	3	2	833	20	0.8	184.548	2.21	30.1109	66.545	9.25	0.011163	1.37	1.45406	0.163159	0.247218
2	3	15	Ligustrum lucidum	0	1	3	2	833	20	0.8	219.75	2.21	35.8543	79.2381	9.25	0.011163	1.37	1.42129	0.163159	0.214451
2	3	15	Ligustrum lucidum	0	1	3	2	833	20	0.8	184.808	2.21	30.1533	66.6388	9.25	0.011163	1.37	1.45377	0.163159	0.246932
6	4	16	Lolium perenne	0	1	2	2	756.287	8.0545	0.785	88.159	2	71.9849	174.926	15.923	0.013494	1.664	1.80322	0.816535	0.955753
6	4	16	Lolium perenne	0	1	2	3	800.856	12.37	0.856	82.6938	2.41	116.38	333.76	23.941	0.013494	1.971	1.8305	1.40736	1.26686
6	4	16	Lolium perenne	0	1	2	2	747.323	7.5454	0.774	120.371	2	79.9444	195.733	15.063	0.013494	1.56	1.56731	0.66415	0.671463
6	4	16	Lolium perenne	0	1	2	3	772.8	7.309	0.772	97.3435	2	76.5795	188.146	19.3241	0.013494	1.485	1.70243	0.786692	1.00412
6	4	16	Lolium perenne	0	1	2	4	760.523	9.2181	0.795	71.7956	2	86.5768	206.758	21.4834	0.013494	1.834	1.95125	1.20588	1.32313
6	4	16	Lolium perenne	0	1	2	2	798.277	7.3363	0.765	134.544	2	83.5796	205.262	17.394	0.013494	1.397	1.56687	0.621204	0.791073
6	4	16	Lolium perenne	0	1	2	3	681.744	8.8272	0.813	102.447	2	89.508	215.018	21.86	0.013494	1.491	1.57943	0.873699	0.962125
6	4	16	Lolium perenne	0	1	2	2	763.836	7.1181	0.772	153.367	2	77.664	191.344	16.0148	0.013494	1.349	1.49413	0.506393	0.651519
6	4	16	Lolium perenne	0	1	2	1	727.036	9.4727	0.804	147.69	2	60.8651	144.797	18.9555	0.013494	1.124	1.21258	0.412113	0.500689
2	1	17	Picea abies	1	1	2	2	708	16	0.6	132.594	1.975	47.1326	99.8739	1.59655	0.011445	6.82722	6.74021	0.355464	0.268454
2	1	17	Picea abies	1	1	2	2	708	16	0.6	53.3956	1.975	23.9775	50.8083	1.90331	0.011445	6.46242	6.47582	0.449054	0.462451
2	1	17	Picea abies	1	1	2	2	708	16	0.6	156.226	1.975	37.8065	80.1121	1.46585	0.011445	8.04996	8.01592	0.241999	0.207955
2	1	18	Pinus silvestris	1	1	2	2	708	16	0.6	97.1868	1.975	28.1687	59.6895	3.61087	0.011445	3.45952	3.45244	0.28984	0.282757
2	1	18	Pinus silvestris	1	1	2	2	708	16	0.6	64.9817	1.975	21.4038	45.3546	3.5057	0.011445	3.59415	3.61364	0.329381	0.348874
2	1	18	Pinus silvestris	1	1	2	2	708	16	0.6	68.7563	1.975	32.5695	69.0147	3.70425	0.011445	3.56347	3.5254	0.473694	0.435622
2	1	19	Pinus strobus	1	1	2	2	708	16	0.6	30.5904	2.5088	72.6328	192.68	1.9604	0.011445	8.21261	8.32108	2.37436	2.48283
7	4	20	Poaceae Meadow	0	1	3	3	856.783	10.218	0.8	40.51	1.7	49.3946	101.365	28.1523	0.013494	1.69865	1.69522	1.21932	1.21589
7	4	20	Poaceae Meadow	0	1	3	3	880.242	10.218	0.8	40.51	1.7	50.2077	103.033	25.9135	0.013494	1.76013	1.7814	1.23939	1.26066
7	4	20	Poaceae Meadow	0	1	2	3	836.778	10.218	0.6	40.51	1.7	65.2022	133.804	20.2647	0.013494	2.27543	2.20344	1.60953	1.53754
7	4	20	Poaceae Meadow	0	1	3	3	939.343	10.218	0.8	40.51	1.7	45.635	93.6496	29.0583	0.013494	1.59089	1.73873	1.12651	1.27434
5	2	21	Populus x euamericanan	4	1	3	4	900	21	0.8	20.1108	2.15	54.5267	115.269	11.4286	0.011299	3.7	3.3982	2.71132	2.40952
5	2	21	Populus x euamericanan	4	1	3	4	900	21	0.8	21.9008	2.15	50.2858	106.304	12.5	0.011299	3.2	3.09104	2.29607	2.1871
5	2	21	Populus x euamericanan	4	1	3	4	900	21	0.8	21.83	2.15	46.9536	99.2599	11.9048	0.011299	3.1	3.10463	2.15087	2.1555
5	2	21	Populus x euamericanan	4	1	3	4	900	21	0.8	19.7756	2.15	44.2272	93.4964	13.8889	0.011299	3.05	3.15714	2.23646	2.3436
5	2	21	Populus x euamericanan	4	1	3	4	900	21	0.8	19.082	2.15	37.8658	80.0483	11.236	0.011299	2.99	3.34395	1.98437	2.33833
5	2	21	Populus x euamericanan	4	1	3	4	900	21	0.8	19.5404	2.15	42.4097	89.6541	14.4928	0.011299	2.95	3.12677	2.17036	2.34713
5	2	21	Populus x euamericanan	4	1	3	4	900	21	0.8	25.5625	2.05	48.4682	97.615	12.5	0.011299	2.8	2.46295	1.89606	1.55902
5	2	21	Populus x euamericanan	4	1	3	2	900	21	0.8	33.3753	2.05	53.618	107.987	11.976	0.011299	2.55	2.17073	1.60652	1.22725
5	2	21	Populus x euamericanan	4	1	3	2	900	21	0.8	24.8287	2.05	34.8365	70.1608	11.1111	0.011299	2.42	2.47157	1.40307	1.45464
5	2	21	Populus x euamericanan	4	1	3	2	900	21	0.8	23.746	2.05	35.4424	71.3809	13.3333	0.011299	2.34	2.37735	1.49256	1.52991
5	2	21	Populus x euamericanan	4	1	3	2	900	21	0.8	35.6646	2.05	50.2858	101.275	12.987	0.011299	2.28	1.99883	1.40996	1.1288
5	2	21	Populus x euamericanan	4	1	3	2	900	21	0.8	31.8878	2.05	40.2892	81.1424	12.1951	0.011299	2.19	2.11704	1.26347	1.19051
5	2	21	Populus x euamericanan	4	1	3	2	900	21	0.8	34.1899	2.05	42.4097	85.4131	12.4224	0.011299	2.15	2.03988	1.24042	1.1303
5	2	21	Populus x euamericanan	4	1	3	2	900	21	0.8	26.5479	2.05	33.3219	67.1103	13.6986	0.011299	2.08	2.16493	1.25516	1.34009
2	2	22	Prunus laurocerasus	0	1	3	2	833	20	0.8	41.4016	2.01	16.6488	33.4641	6.25	0.011299	2.21	2.36269	0.40213	0.554817
2	2	22	Prunus laurocerasus	0	1	3	2	833	20	0.8	50.8932	2.01	20.4657	41.1361	6.25	0.011299	2.21	2.30517	0.40213	0.497299
2	2	22	Prunus laurocerasus	0	1	3	2	833	20	0.8	50.9685	2.01	20.496	41.1969	6.25	0.011299	2.21	2.30477	0.40213	0.496897
5	1	23	Pseudotsuga menziesii Douglas-fir	4	1	3	4	900	21	0.8	12.9615	1.98	21.2499	41.3098	11.7647	0.011653	2.63	2.63219	1.63946	1.64165
5	1	23	Pseudotsuga menziesii Douglas-fir	4	1	3	4	900	21	0.8	9.35088	1.98	15.8981	30.9058	13.245	0.011653	2.58	2.68849	1.70017	1.80866
5	1	23	Pseudotsuga menziesii Douglas-fir	4	1	3	4	900	21	0.8	9.61849	1.98	14.7429	28.6602	12.0482	0.011653	2.5	2.60087	1.53277	1.63364
5	1	23	Pseudotsuga menziesii Douglas-fir	4	1	3	4	900	21	0.8	9.69721	1.98	12.9073	25.0918	12.8205	0.011653	2.24	2.29814	1.33103	1.38917
5	1	23	Pseudotsuga menziesii Douglas-fir	4	1	3	4	900	21	0.8	9.70243	1.98	12.506	24.3117	13.8889	0.011653	2.128	2.16914	1.28895	1.33009
5	1	23	Pseudotsuga menziesii Douglas-fir	4	1	3	4	900	21	0.8	9.89523	1.98	11.1879	21.7492	11.6959	0.011653	2.127	2.0831	1.13063	1.08674
5	1	23	Pseudotsuga menziesii Douglas-fir	4	1	3	4	900	21	0.8	10.5981	1.98	13.8757	26.9743	14.2857	0.011653	2.125	2.2042	1.30926	1.38846
5	1	23	Pseudotsuga menziesii Douglas-fir	4	1	3	4	900	21	0.8	9.4358	1.98	10.9233	21.235	13.5135	0.011653	2.02	1.94851	1.15765	1.08616
5	1	23	Pseudotsuga menziesii Douglas-fir	4	1	3	4	900	21	0.8	10.8783	1.98	11.2887	21.9452	12.5	0.011653	1.97	1.93777	1.03773	1.00549
5	1	23	Pseudotsuga menziesii Douglas-fir	4	1	3	3	900	21	0.8	13.2851	1.98	13.5749	26.3897	13.4228	0.011653	1.89	1.94797	1.02182	1.07979
5	1	23	Pseudotsuga menziesii Douglas-fir	4	1	3	3	900	21	0.8	11.5634	1.98	11.0345	21.4511	14.2857	0.011653	1.77	1.72072	0.954261	0.904981
5	1	23	Pseudotsuga menziesii Douglas-fir	4	1	3	3	900	21	0.8	15.9088	1.98	11.8954	23.1247	12.5	0.011653	1.68	1.68484	0.747727	0.752568
5	1	23	Pseudotsuga menziesii Douglas-fir	4	1	3	3	900	21	0.8	15.4046	1.98	13.2742	25.805	15.2672	0.011653	1.625	1.66958	0.861701	0.906281
5	1	23	Pseudotsuga menziesii Douglas-fir	4	1	3	3	900	21	0.8	29.18	1.98	18	34.992	12.9032	0.011653	1.52	1.54793	0.61686	0.644791
5	1	23	Pseudotsuga menziesii Douglas-fir	4	1	3	3	900	21	0.8	30.4263	1.98	22.5924	43.9196	15.3846	0.011653	1.5	1.48635	0.742528	0.728879
5	1	23	Pseudotsuga menziesii Douglas-fir	4	1	3	3	900	21	0.8	33.3662	1.98	21.845	42.4667	12.6582	0.011653	1.49	1.4858	0.56938	0.565179
5	1	23	Pseudotsuga menziesii Douglas-fir	4	1	3	3	900	21	0.8	29.1534	2.05	18.3703	36.9979	13.7931	0.011653	1.475	1.84482	0.630127	0.999946
5	1	23	Pseudotsuga menziesii Douglas-fir	4	1	3	2	900	21	0.8	49.8555	2.05	31.2823	63.0025	13.8313	0.011653	1.47	1.54109	0.627458	0.698549
5	1	23	Pseudotsuga menziesii Douglas-fir	4	1	3	2	900	21	0.8	39.6815	2.05	23.9436	48.2224	14.8148	0.011653	1.39	1.58929	0.603395	0.802682
1	1	24	Quercus ilex	4	2	3	2	500	21	0.8	105.257	2.25	18.1855	44.3951	9.57121	0.011445	1.37914	1.34865	0.183335	0.152841
1	1	24	Quercus ilex	4	1	3	2	500	21	0.8	65.1877	2.5088	24.3798	60.2865	9.77199	0.011445	1.54523	1.65711	0.373994	0.485875
1	1	24	Quercus ilex	4	2	3	3	500	21	0.8	80.9627	2.32	17.8934	44.9347	10.4276	0.011445	1.3365	1.33054	0.238904	0.232947
1	1	24	Quercus ilex	4	1	3	3	500	21	0.8	58.8048	2.63645	23.8999	62.1506	9.97653	0.011445	1.55365	1.71849	0.406427	0.57127
1	1	24	Quercus ilex	4	1	3	2	500	21	0.8	63.1213	2.5088	27.0462	66.8799	8.76289	0.011445	1.73459	1.81353	0.428479	0.507422
1	1	24	Quercus ilex	4	2	3	3	500	21	0.8	60.3402	2.5088	18.0639	48.7734	9.47867	0.011445	1.5403	1.61213	0.33282	0.404654
1	1	24	Quercus ilex	4	2	3	3	500	21	0.8	51.2344	2.5088	19.316	52.1541	10.6509	0.011445	1.50222	1.56444	0.427633	0.489856
1	1	24	Quercus ilex	4	1	3	2	500	21	0.8	81.7153	2.5088	26.7653	66.1852	8.7156	0.011445	1.64074	1.70471	0.327543	0.39151
1	1	24	Quercus ilex	4	1	3	3	500	21	0.8	60.8803	2.5088	28.161	69.6365	8.33333	0.011445	1.836	1.90191	0.462563	0.528476
1	1	24	Quercus ilex	4	2	3	4	500	21	0.8	34.7367	2.5088	19.3355	52.2066	8.38509	0.011445	2.03933	2.13676	0.674371	0.771804
1	1	24	Quercus ilex	4	2	3	4	500	21	0.8	52.2727	2.5088	16.0094	43.2262	10.5485	0.011445	1.43148	1.55419	0.346465	0.469173
1	1	24	Quercus ilex	4	1	3	4	500	21	0.8	59.7661	2.5088	29.2208	72.2572	10.7477	0.011445	1.55383	1.6055	0.488919	0.540592
1	1	24	Quercus ilex	4	1	3	4	500	21	0.8	50.2597	2.5088	27.1141	67.0479	13.0769	0.011445	1.41471	1.51268	0.539481	0.637451
1	1	24	Quercus ilex	4	2	3	4	500	21	0.8	82.2795	2.41	17.0292	44.2971	8.8547	0.011445	1.4391	1.46216	0.146532	0.169587
2	1	24	Quercus ilex	4	2	3	3	500	21	0.8	45.8121	2.5088	25.1481	67.9009	8.93744	0.011445	1.9133	1.85486	0.632698	0.57426
2	1	24	Quercus ilex	4	1	3	4	500	21	0.8	47.5061	2.5088	27.1009	67.0152	9.56175	0.011445	1.76746	1.87135	0.570472	0.674362
1	1	24	Quercus ilex	4	2	3	2	500	21	0.8	65.7505	2.73543	9.89431	28.9574	24.4591	0.011445	0.63371	0.877073	0.165773	0.409136
1	1	24	Quercus ilex	4	1	3	2	500	21	0.8	98.6222	2.5088	20.2582	50.0945	8.8182	0.011445	1.50333	1.61313	0.205412	0.315208
1	2	25	Quercus robur	4	1	3	4	500	21	0.8	17.2585	2.5088	38.0072	93.9844	13.0326	0.011299	3.06923	2.78332	2.20223	1.91633
1	2	25	Quercus robur	4	2	3	4	500	21	0.8	24.356	3.14872	28.5793	95.4537	13.8889	0.011299	2.376	2.4819	1.56246	1.66836
1	2	26	Quercus robur	4	1	3	3	500	21	0.8	31.7832	2.5088	38.7135	95.7307	16.6667	0.011299	1.896	1.71973	1.21805	1.04177
1	2	26	Quercus robur	4	2	3	3	500	21	0.8	34.9485	2.5088	24.2593	65.5011	14.8837	0.011299	1.59906	1.54592	0.839896	0.786755
1	2	26	Quercus robur	4	2	3	3	500	21	0.8	31.3792	2.81989	24.2714	73.0842	17.6271	0.011299	1.59981	1.71468	0.958798	1.07367
1	2	26	Quercus robur	4	1	3	2	500	21	0.8	48.7276	2.5088	19.3511	47.8515	19.6429	0.011299	0.97236	1.2104	0.397128	0.635165
1	2	26	Quercus robur	4	2	3	2	500	21	0.8	87.9819	2.5088	14.6269	39.4933	14.5658	0.011299	0.95429	1.03791	0.178557	0.262176
1	2	26	Quercus robur	1	1	2	2	708	16	0.6	31.3659	1.95	30.1284	63.0889	12.0773	0.011299	1.89612	1.69497	0.960547	0.759394
2	2	26	Quercus robur	1	1	2	2	708	16	0.6	34.6038	1.98	35.6872	75.7996	13.0909	0.011299	1.89444	1.79595	1.03131	0.932814
2	2	26	Quercus robur	1	1	2	2	708	16	0.6	35.4641	1.98	34.8724	74.0689	12.9164	0.011299	1.85811	1.77418	0.983315	0.899381
2	3	27	Senecio fucsii	0	1	3	2	833	20	0.8	75.3153	2.5088	46.996	117.904	18.73	0.011163	1.22	1.40927	0.623989	0.813257
2	3	27	Senecio fucsii	0	1	3	2	833	20	0.8	69.3149	2.5088	43.2518	108.51	18.73	0.011163	1.22	1.46956	0.623989	0.873554
2	3	27	Senecio fucsii	0	1	3	2	833	20	0.8	76.0435	2.5088	47.4504	119.043	18.73	0.011163	1.22	1.40258	0.623989	0.806572
3	3	28	Senecio vulgaris	2	1	2	1	555	18	0.6	75.2533	2.5088	60.5803	156.346	39.548	0.011163	1.08729	0.938781	0.805018	0.65651
3	3	28	Senecio vulgaris	2	1	2	1	555	18	0.6	60.676	2.25468	60.1551	139.962	34.1297	0.011163	1.3185	1.01824	0.991416	0.691152
3	3	28	Senecio vulgaris	2	2	2	2	555	18	0.6	55.9646	2.57631	46.0911	132.537	30.137	0.011163	1.29409	1.10689	0.923672	0.73647
3	3	28	Senecio vulgaris	2	2	2	2	555	18	0.6	84.9129	2.51574	41.6396	117.215	43.2432	0.011163	0.78625	0.702803	0.528099	0.444653
3	3	28	Senecio vulgaris	2	2	2	2	555	18	0.6	44.6052	3.04947	41.9929	140.622	30.137	0.011163	1.46	1.51436	1.08958	1.14395
3	3	28	Senecio vulgaris	2	2	2	2	555	18	0.6	50.2111	2.70608	46.6363	140.157	30.137	0.011163	1.42682	1.26254	1.0564	0.892124
3	3	28	Senecio vulgaris	2	1	2	1	555	18	0.6	74.1344	2.1877	62.74	141.774	36.4372	0.011163	1.15267	0.838352	0.8463	0.531982
3	3	28	Senecio vulgaris	2	1	2	1	555	18	0.6	42.2555	2.43258	34.3885	86.1287	28.0612	0.011163	1.21164	1.45489	0.813821	1.05708
2	1	29	Sequoiadendron spec.	1	1	2	2	708	16	0.6	49.0827	2.31785	84.3097	207.558	1.84604	0.011299	5.68785	5.38192	1.71771	1.41178
2	1	30	Taxus baccata	1	1	2	2	708	16	0.6	28.5586	2.5088	70.3	186.492	3.59712	0.011445	5.6434	5.82808	2.4616	2.64629
7	4	31	Trisetum flavescens	0	1	3	3	856.783	10.218	0.8	37.14	1.69	50.0041	102.116	31.8919	0.013494	1.76949	1.68954	1.34637	1.26642
7	4	31	Trisetum flavescens	0	1	3	3	880.242	10.218	0.8	37.14	1.69	40.8988	83.5212	29.6817	0.013494	1.55584	1.59543	1.1012	1.1408
7	4	31	Trisetum flavescens	0	1	2	3	836.778	10.218	0.6	37.14	1.69	53.996	110.268	20.5415	0.013494	2.11077	2.13569	1.45385	1.47876
7	4	31	Trisetum flavescens	0	1	3	3	939.343	10.218	0.8	37.14	1.69	42.0962	85.9665	26.3398	0.013494	1.64576	1.75404	1.13345	1.24173
10	5	32	Tritcum aestivum cv. Apache	0	1	2	3	1118.93	15.06	0.524	44.18	2.4	75.9396	195.76	16.8898	0.010668	2.35054	2.53942	1.71887	1.90775
10	5	32	Tritcum aestivum cv. Apache	0	1	2	3	1118.93	15.06	0.524	44.18	2.4	78.7283	202.949	17.6383	0.010668	2.38685	2.54278	1.78199	1.93792
10	5	32	Tritcum aestivum cv. Apache	0	1	2	3	1118.93	15.06	0.524	44.18	2.4	89.0156	229.468	16.1955	0.010668	2.67359	2.61653	2.01484	1.95778
8	5	33	Tritcum aestivum cv. Arche	0	1	2	3	629	13.47	0.643	44.18	2.4	91.2573	240.47	18.2715	0.010668	2.64948	2.51455	2.06558	1.93065
8	5	33	Tritcum aestivum cv. Arche	0	1	2	3	629	13.47	0.643	44.18	2.4	90.9735	239.722	18.3722	0.010668	2.63985	2.51082	2.05916	1.93012
8	5	34	Tritcum aestivum cv. Isengrain	0	1	2	3	838.5	15.44	0.82	44.18	2.4	106.166	272.227	13.704	0.010668	3.18155	2.91734	2.40304	2.13883
8	5	35	Tritcum aestivum cv. Renan	0	1	2	3	1103	13.37	0.59	44.18	2.4	116.164	306.52	13.2205	0.010668	3.43633	3.32607	2.62934	2.51909
8	5	35	Tritcum aestivum cv. Renan	0	1	2	3	1103	13.37	0.59	44.18	2.4	118.733	313.297	13.2732	0.010668	3.49126	3.32739	2.68747	2.52361
8	5	35	Tritcum aestivum cv. Renan	0	1	2	3	1103	13.37	0.59	44.18	2.4	121.662	321.026	13.2732	0.010668	3.55755	3.33231	2.75377	2.52853
8,9	5	36	Tritcum aestivum cv. Tamaro	0	1	2	3	630.177	13.2	0.721	44.18	2.4	96.7365	255.849	15.0399	0.010668	2.89896	2.77551	2.1896	2.06615
8, 9	5	36	Tritcum aestivum cv. Tamaro	0	1	2	3	630.177	13.2	0.721	44.18	2.4	96.854	256.159	15.0399	0.010668	2.90162	2.77575	2.19226	2.06638
8, 9	5	36	Tritcum aestivum cv. Tamaro	0	1	2	3	630.177	13.2	0.721	44.18	2.4	91.2433	241.32	15.0399	0.010668	2.77463	2.76493	2.06526	2.05556
8, 9	5	37	Tritcum aestivum cv. Thesee	0	1	2	1	668.9	14	0.74	44.18	2.4	63.2296	165.409	16.5117	0.010668	2.07731	2.2932	1.43118	1.64707
8, 9	5	37	Tritcum aestivum cv. Thesee	0	1	2	1	668.9	14	0.74	44.18	2.4	68.4349	179.026	16.7406	0.010668	2.1863	2.30252	1.549	1.66523
8, 9	5	37	Tritcum aestivum cv. Thesee	0	1	2	1	668.9	14	0.74	44.18	2.4	79.6738	208.427	15.4327	0.010668	2.4947	2.38665	1.80339	1.69534
8, 9	5	37	Tritcum aestivum cv. Thesee	0	1	2	1	668.9	14	0.74	44.18	2.4	73.2421	191.601	16.426	0.010668	2.30731	2.33117	1.65781	1.68167
8, 9	5	37	Tritcum aestivum cv. Thesee	0	1	2	1	668.9	14	0.74	44.18	2.4	83.6827	218.914	15.2214	0.010668	2.59504	2.40291	1.89413	1.702
8, 9	5	37	Tritcum aestivum cv. Thesee	0	1	2	1	668.9	14	0.74	44.18	2.4	81.8601	214.146	15.3444	0.010668	2.54816	2.39433	1.85288	1.69904
8, 9	5	37	Tritcum aestivum cv. Thesee	0	1	2	3	668.9	14	0.74	44.18	2.4	68.4064	178.951	18.4268	0.010668	2.12733	2.24411	1.54836	1.66513
8, 9	5	37	Tritcum aestivum cv. Thesee	0	1	2	3	668.9	14	0.74	44.18	2.4	70.9447	185.591	16.522	0.010668	2.25154	2.31958	1.60581	1.67385
8, 9	5	37	Tritcum aestivum cv. Thesee	0	1	2	3	668.9	14	0.74	44.18	2.4	72.2417	188.984	15.9196	0.010668	2.30533	2.34843	1.63517	1.67827
8, 9	5	37	Tritcum aestivum cv. Thesee	0	1	2	1	668.9	14	0.74	44.18	2.4	60.8484	159.179	18.4648	0.010668	1.95507	2.21642	1.37728	1.63863
8, 9	5	37	Tritcum aestivum cv. Thesee	0	1	2	1	668.9	14	0.74	44.18	2.4	63.5589	166.27	19.0676	0.010668	1.99816	2.20776	1.43864	1.64823
8, 9	5	37	Tritcum aestivum cv. Thesee	0	1	2	1	668.9	14	0.74	44.18	2.4	60.2664	157.657	18.3499	0.010668	1.94552	2.21795	1.36411	1.63655
8, 9	5	37	Tritcum aestivum cv. Thesee	0	1	2	1	668.9	14	0.74	44.18	2.4	60.724	158.854	20.1032	0.010668	1.90517	2.16888	1.37447	1.63818
8	5	37	Tritcum aestivum cv. Thesee	0	1	2	1	668.9	14	0.74	44.18	2.4	64.7758	169.454	20.1416	0.010668	1.99587	2.18219	1.46618	1.65251
8	5	37	Tritcum aestivum cv. Thesee	0	1	2	1	668.9	14	0.74	44.18	2.4	70.2484	183.77	18.8241	0.010668	2.15681	2.23822	1.59005	1.67146
8	5	37	Tritcum aestivum cv. Thesee	0	1	2	3	668.9	14	0.74	44.18	2.4	59.874	156.631	20.3886	0.010668	1.8785	2.15841	1.35523	1.63514
8	5	37	Tritcum aestivum cv. Thesee	0	1	2	3	668.9	14	0.74	44.18	2.4	58.9993	154.342	19.7174	0.010668	1.87651	2.17308	1.33543	1.632
8	5	37	Tritcum aestivum cv. Thesee	0	1	2	3	668.9	14	0.74	44.18	2.4	68.4031	178.942	19.3965	0.010668	2.09832	2.21515	1.54828	1.66512
8	5	37	Tritcum aestivum cv. Thesee	3	1	2	3	732.06	14.46	0.73	44.18	2.4	78.2944	203.522	18.2439	0.010668	2.35695	2.48316	1.77217	1.89838
8	5	37	Tritcum aestivum cv. Thesee	3	1	2	3	732.06	14.46	0.73	44.18	2.4	90.0364	234.044	16.6497	0.010668	2.67872	2.57449	2.03794	1.93372
8	5	37	Tritcum aestivum cv. Thesee	3	1	2	3	732.06	14.46	0.73	44.18	2.4	88.0385	228.851	17.5294	0.010668	2.60134	2.53831	1.99272	1.92969
8	5	37	Tritcum aestivum cv. Thesee	3	1	2	3	732.06	14.46	0.73	44.18	2.4	82.2704	213.857	17.7381	0.010668	2.46362	2.51471	1.86216	1.91325
8	5	37	Tritcum aestivum cv. Thesee	3	1	2	3	732.06	14.46	0.73	44.18	2.4	89.1267	231.679	17.1667	0.010668	2.63883	2.55338	2.01735	1.9319
8	5	37	Tritcum aestivum cv. Thesee	3	1	2	3	732.06	14.46	0.73	44.18	2.4	76.6122	199.149	19.6248	0.010668	2.27773	2.43566	1.73409	1.89203
8	5	37	Tritcum aestivum cv. Thesee	3	1	2	3	732.06	14.46	0.73	44.18	2.4	88.053	228.889	16.6234	0.010668	2.63484	2.57152	1.99305	1.92972
8	5	37	Tritcum aestivum cv. Thesee	3	1	2	3	732.06	14.46	0.73	44.18	2.4	82.7338	215.061	18.4931	0.010668	2.44956	2.49187	1.87265	1.91497
8	5	37	Tritcum aestivum cv. Thesee	3	1	2	3	732.06	14.46	0.73	44.18	2.4	81.5576	212.004	16.8639	0.010668	2.47867	2.54324	1.84603	1.9106
8	5	37	Tritcum aestivum cv. Thesee	3	1	2	3	732.06	14.46	0.73	44.18	2.4	81.826	212.702	16.2687	0.010668	2.50789	2.56738	1.8521	1.9116
8	5	37	Tritcum aestivum cv. Thesee	3	1	2	3	732.06	14.46	0.73	44.18	2.4	81.416	211.636	18.3041	0.010668	2.42569	2.49293	1.84282	1.91007
8	5	37	Tritcum aestivum cv. Thesee	3	1	2	3	732.06	14.46	0.73	44.18	2.4	88.878	231.033	17.513	0.010668	2.62092	2.54059	2.01173	1.9314
8	5	37	Tritcum aestivum cv. Thesee	3	1	2	3	732.06	14.46	0.73	44.18	2.4	95.8739	249.218	15.7282	0.010668	2.8484	2.62302	2.17007	1.9447
8	5	37	Tritcum aestivum cv. Thesee	3	1	2	3	732.06	14.46	0.73	44.18	2.4	101.613	264.136	15.1442	0.010668	3.00444	2.65894	2.29997	1.95446
8	5	37	Tritcum aestivum cv. Thesee	3	1	2	3	732.06	14.46	0.73	44.18	2.4	82.0785	213.358	16.6492	0.010668	2.49862	2.55333	1.85782	1.91254
8	5	37	Tritcum aestivum cv. Thesee	3	1	3	3	840	14.12	0.54	44.18	2.4	100.538	262.573	15.7895	0.010668	2.95133	2.9117	2.27565	2.23601
8	5	37	Tritcum aestivum cv. Thesee	3	1	3	3	840	14.12	0.54	44.18	2.4	96.1002	250.983	15.875	0.010668	2.84724	2.89869	2.1752	2.22664
8	5	37	Tritcum aestivum cv. Thesee	3	1	3	3	840	14.12	0.54	44.18	2.4	94.9579	248	15.8333	0.010668	2.82316	2.89793	2.14934	2.22411
8	5	37	Tritcum aestivum cv. Thesee	3	1	2	3	840	14.12	0.54	44.18	2.4	107.301	280.235	14.9992	0.010668	3.14	2.96026	2.42871	2.24898
8	5	37	Tritcum aestivum cv. Thesee	3	1	2	3	840	14.12	0.54	44.18	2.4	101.423	264.884	16.7407	0.010668	2.93296	2.87509	2.29567	2.2378
8	5	37	Tritcum aestivum cv. Thesee	3	1	2	3	840	14.12	0.54	44.18	2.4	104.41	272.687	15.0769	0.010668	3.07092	2.95124	2.3633	2.24362
8	5	37	Tritcum aestivum cv. Thesee	3	1	3	3	840	14.12	0.54	44.18	2.4	94.3203	246.334	16.5493	0.010668	2.77957	2.86734	2.13491	2.22268
8	5	37	Tritcum aestivum cv. Thesee	3	1	3	3	840	14.12	0.54	44.18	2.4	88.1064	230.106	17.4658	0.010668	2.6051	2.80007	1.99426	2.18923
8	5	37	Tritcum aestivum cv. Thesee	3	1	3	3	840	14.12	0.54	44.18	2.4	98.8545	258.176	16.3265	0.010668	2.891	2.886	2.23754	2.23254
8	5	37	Tritcum aestivum cv. Thesee	3	1	2	3	840	14.12	0.54	44.18	2.4	98.6282	257.585	16.0504	0.010668	2.89712	2.89677	2.23242	2.23207
8	5	37	Tritcum aestivum cv. Thesee	3	1	2	3	840	14.12	0.54	44.18	2.4	102.37	267.357	16.2406	0.010668	2.97403	2.89659	2.31711	2.23967
8	5	37	Tritcum aestivum cv. Thesee	3	1	2	3	840	14.12	0.54	44.18	2.4	102.575	267.894	15.6051	0.010668	3.00543	2.92375	2.32176	2.24008
4	5	38	Triticum aestivum cv. Minaret	3	1	3	3	833	20	0.8	51.8376	2.1624	30.2926	65.5047	30	0.010668	0.94	1.18156	0.584375	0.825931
4	5	38	Triticum aestivum cv. Minaret	3	1	3	3	833	20	0.8	70.1711	2.1624	42.4097	91.7066	30	0.010668	0.96	1.01194	0.604375	0.656313
4	5	38	Triticum aestivum cv. Minaret	3	1	3	3	833	20	0.8	58.7105	2.12073	52.5092	111.358	30	0.010668	1.25	1.12986	0.894375	0.774233
4	5	38	Triticum aestivum cv. Minaret	3	1	3	3	833	20	0.8	38.6759	2.2164	40.3922	89.5253	30	0.010668	1.4	1.61173	1.04438	1.2561
4	5	38	Triticum aestivum cv. Minaret	3	1	3	3	833	20	0.8	44.0552	2.1153	46.4507	98.257	30	0.010668	1.41	1.35695	1.05438	1.00132
4	5	38	Triticum aestivum cv. Minaret	3	1	3	3	833	20	0.8	49.1243	2.1625	62.6028	135.379	30	0.010668	1.63	1.36617	1.27438	1.01055
4	5	38	Triticum aestivum cv. Minaret	3	1	3	3	833	20	0.8	36.9658	2.19964	58.5678	128.828	30	0.010668	1.94	1.74115	1.58438	1.38552
4	5	38	Triticum aestivum cv. Minaret	3	1	3	3	833	20	0.8	37.9994	2.12639	60.5853	128.828	30	0.010668	1.95	1.59549	1.59438	1.23986
4	5	38	Triticum aestivum cv. Minaret	3	1	3	3	833	20	0.8	43.0647	2.16249	68.6613	148.479	30	0.010668	1.95	1.52561	1.59438	1.16999
2	3	39	Viburnum lantana	0	1	3	2	833	20	0.8	139.666	2.5088	15.6492	39.2607	12.03	0.011163	1.04	1.31726	0.112047	0.389305
2	3	39	Viburnum lantana	0	1	3	2	833	20	0.8	162.376	2.5088	18.1938	45.6445	12.03	0.011163	1.04	1.26722	0.112047	0.33927
2	3	39	Viburnum lantana	0	1	3	2	833	20	0.8	193.25	2.5088	21.6532	54.3235	12.03	0.011163	1.04	1.21764	0.112047	0.289689
