# Supplementary material for: The Coordination of Leaf Photosynthesis Links C and N Fluxes in C3 Plant Species
Source: PLoS One. 2012 Jun 7;7(6):e38345. doi: 10.1371/journal.pone.0038345 (PMC3369925; doi:10.1371/journal.pone.0038345)
Supplement: Table S4 — Multiple regression analyses of k 3 and J fac from environmental growth conditions for a bootstrap analysis. Independent variables were the same as Table S3. The number of observations was 236. (DOC) [file pone.0038345.s007.doc]

**Table S4. Multiple regression analyses of *k*3 and *J*fac from environmental growth conditions for a bootstrap analysis.** Independent variables were the same as Table S4. The number of observations was 236.

|  | *k*3 | | |  | *J*fac | | |
| --- | --- | --- | --- | --- | --- | --- | --- |
| Data | Equation | *P-value* | *r2* |  | Equation | *P-value* | *r2* |
| 1 | log Y = 10-2.(311.2+9.12*X1-30.8*X2+19.0*X3+0.20*X4-7.64*X5+319.1*X6-0.29*X4*X6) | < 0.001 | 0.37 |  | log Y = 10-2.(-0.76+8.70*X1-0.63*X2-9.54*X3+0.10*X4-0.41*X5+162.2*X6-0.23*X4*X6+0.003*X4*X5) | < 0.001 | 0.50 |
| 2 | log Y = 10-2.(321.0+7.65*X1-30.3*X2+9.49*X3+0.20*X4-7.00*X5+334.9*X6-0.32*X4*X6) | < 0.001 | 0.35 |  | log Y = 10-2.( 19.6+7.71*X1-0.40*X2-5.06*X3+0.08*X4-1.11*X5+142.0*X6-0.22*X4*X6+0.004*X4*X5) | < 0.001 | 0.50 |
| 3 | log Y = 10-2.(301.7+18.3*X1-27.7*X2+12.0*X3+0.20*X4-7.37*X5+320.3*X6-0.29*X4*X6) | < 0.001 | 0.36 |  | log Y = 10-2.(-5.49+9.19*X1+0.002*X2-6.33*X3+0.10*X4-0.96*X5+171.4*X6-0.25*X4*X6+0.003*X4*X5) | < 0.001 | 0.51 |
| 4 | log Y = 10-2.(326.9+4.82*X1-27.4*X2+12.7*X3+0.19*X4-7.00*X5+312.3*X6-0.30*X4*X6) | < 0.001 | 0.36 |  | log Y = 10-2.( 3.59+9.35*X1+0.17*X2-7.64*X3+0.10*X4-1.55*X5+174.8*X6-0.26*X4*X6+0.004*X4*X5) | < 0.001 | 0.49 |
| 5 | log Y = 10-2.(351.8+3.90*X1-29.4*X2+12.1*X3+0.17*X4-  6.84*X5+ 275.9*X6-0.26*X4*X6) | < 0.001 | 0.33 |  | log Y = 10-2.(-8.75+8.77*X1-0.50*X2-6.53*X3+0.11*X4-1.53*X5+193.0*X6-0.28*X4*X6+0.004*X4*X5) | < 0.001 | 0.49 |
| 6 | log Y = 10-2.(326.0+8.24*X1-27.8*X2+9.11*X3+0.18*X4-6.46*X5+292.3*X6-0.25*X4*X6) | < 0.001 | 0.30 |  | log Y = 10-2.( 14.9+7.92*X1-0.53*X2-6.66*X3+0.08*X4-1.19*X5+151.9*X6-0.23*X4*X6+0.004*X4*X5) | < 0.001 | 0.50 |
| 7 | log Y = 10-2.(334.3+7.05*X1-30.1*X2+11.9*X3+0.20*X4-6.90*X5+304.8*X6-0.30*X4*X6) | < 0.001 | 0.35 |  | log Y = 10-2.( 8.50+8.81*X1-0.59*X2-7.26*X3+0.09*X4-0.74*X5+150.4*X6-0.22*X4*X6+0.003*X4*X5) | < 0.001 | 0.50 |
| 8 | log Y = 10-2.(283.0+3.58*X1-27.6*X2+5.70*X3+0.28*X4-7.40*X5+426.6*X6-0.46*X4*X6) | < 0.001 | 0.43 |  | log Y = 10-2.(-10.4+8.74*X1+0.04*X2-9.44*X3+0.11*X4+ 0.35*X5+155.1*X6-0.22*X4*X6+0.002*X4*X5) | < 0.001 | 0.50 |
| 9 | log Y = 10-2.(296.8+8.11*X1-25.7*X2+8.12*X3+0.24*X4-7.21*X5+371.1*X6-0.39*X4*X6) | < 0.001 | 0.38 |  | log Y = 10-2.( 17.1+9.47*X1-0.05*X2-6.62*X3+0.08*X4-0.90*X5+140.6*X6-0.22*X4*X6+0.003*X4*X5) | < 0.001 | 0.50 |
| 10 | log Y = 10-2.(331.9+10.1*X1-33.6*X2+8.75*X3+0.18*X4-6.03*X5+289.7*X6-0.25*X4*X6) | < 0.001 | 0.34 |  | log Y = 10-2.(-3.69+8.23*X1-0.40*X2-8.75*X3+0.10*X4+ 0.03*X5+155.1*X6-0.22*X4*X6+0.002*X4*X5) | < 0.001 | 0.49 |
| 11 | log Y = 10-2.(338.2+7.68*X1-25.8*X2+8.01*X3+0.17*X4-6.52*X5+281.9*X6-0.26*X4*X6) | < 0.001 | 0.34 |  | log Y = 10-2.(-6.53+9.48*X1-0.79*X2-7.49*X3+0.11*X4-0.87*X5+175.6*X6-0.25*X4*X6+0.003*X4*X5) | < 0.001 | 0.52 |
| 12 | log Y = 10-2.(273.8+12.3*X1-31.1*X2+17.6*X3+0.25*X4-8.00*X5+386.5*X6-0.37*X4*X6) | < 0.001 | 0.41 |  | log Y = 10-2.( 7.00+9.50*X1-0.50*X2-5.81*X3+0.09*X4-0.71*X5+149.6*X6-0.23*X4*X6+0.003*X4*X5) | < 0.001 | 0.50 |
| 13 | log Y = 10-2.(311.5+10.4*X1-31.3*X2+18.5*X3+0.22*X4-7.78*X5+336.7*X6-0.34*X4*X6) | < 0.001 | 0.35 |  | log Y = 10-2.(-18.8+7.42*X1-1.02*X2-5.54*X3+0.12*X4-0.78*X5+186.5*X6-0.27*X4*X6+0.003*X4*X5) | < 0.001 | 0.46 |
| 14 | log Y = 10-2.(323.9+10.1*X1-32.8*X2+17.6*X3+0.20*X4-7.58*X5+317.2*X6-0.31*X4*X6) | < 0.001 | 0.39 |  | log Y = 10-2.( 13.6+8.43*X1-0.52*X2-5.65*X3+0.08*X4-1.95*X5+170.4*X6-0.25*X4*X6+0.005*X4*X5) | < 0.001 | 0.48 |
| 15 | log Y = 10-2.(354.8+7.06*X1-25.5*X2+13.6*X3+ 0.15*X4-7.27*X5+265.5*X6-0.25*X4*X6) | < 0.001 | 0.35 |  | log Y = 10-2.( 7.49+7.80*X1-0.02*X2-8.35*X3+0.10*X4-0.71*X5+158.9*X6-0.24*X4*X6+0.003*X4*X5) | < 0.001 | 0.52 |
| 16 | log Y = 10-2.(355.7+6.44*X1-29.3*X2+10.0*X3+0.17*X4-7.02*X5+287.8*X6-0.27*X4*X6) | < 0.001 | 0.37 |  | log Y = 10-2.( 11.0+6.47*X1-0.35*X2-8.63*X3+0.09*X4+ 0.24*X5+133.6*X6-0.20*X4*X6+0.002*X4*X5) | < 0.001 | 0.50 |
| 17 | log Y = 10-2.(313.6+7.55*X1-31.3*X2+15.6*X3+0.22*X4-7.18*X5+331.3*X6-0.33*X4*X6) | < 0.001 | 0.36 |  | log Y = 10-2.( 11.9+9.26*X1-0.68*X2-4.95*X3+0.09*X4-1.89*X5+170.5*X6-0.26*X4*X6+0.004*X4*X5) | < 0.001 | 0.51 |
| 18 | log Y = 10-2.(291.8+11.3*X1-26.8*X2+9.31*X3+0.21*X4-6.79*X5+344.4*X6-0.32*X4*X6) | < 0.001 | 0.36 |  | log Y = 10-2.( 5.86+8.01*X1-0.80*X2-5.84*X3+0.09*X4-1.65*X5+174.6*X6-0.26*X4*X6+0.004*X4*X5) | < 0.001 | 0.50 |
| 19 | log Y = 10-2.(354.5+12.7*X1-27.1*X2+13.4*X3+0.13*X4–7.06*X5+226.9*X6-0.17*X4*X6) | < 0.001 | 0.36 |  | log Y = 10-2.( 19.1+8.60*X1-0.18*X2-7.51*X3+0.08*X4-1.64*X5+159.3*X6-0.24*X4*X6+0.004*X4*X5) | < 0.001 | 0.50 |
| 20 | log Y = 10-2.(328.1+8.46*X1-27.0*X2+12.4*X3+0.20*X4-7.45*X5+311.4*X6-0.31*X4*X6) | < 0.001 | 0.37 |  | log Y = 10-2.( 23.3+9.17*X1-0.79*X2-7.52*X3+0.08*X4-0.86*X5+138.0*X6-0.22*X4*X6+0.003*X4*X5) | < 0.001 | 0.52 |
